# Supplementary material for: Distinct AMPK-Mediated FAS/HSL Pathway Is Implicated in the Alleviating Effect of Nuciferine on Obesity and Hepatic Steatosis in HFD-Fed Mice
Source: MDPI journal article supplement (doi:10.3390/nu14091898), 2022-04-30
Supplement: s1 [file s1]

## *Supplementary materials*

### 1 Supplementary table

**Table S1. Primers used for RT-qPCR analysis**

| Gene            | Forward primer          | Reverse primer          |
|-----------------|-------------------------|-------------------------|
| m-FAS           | GGAGGTGGTGATAGCCGGTAT   | TGGGTAATCCATAGAGCCCAG   |
| m-FGF21         | CTGCTGGGGGTCTACCAAG     | CTGCGCCTACCACTGTTCC     |
| m-ACC           | GATGAACCATCTCCGTTGGC    | GACCCAATTATGAATCGGGAGTG |
| m-SREBP1        | TGACCCGGCTATTCCGTGA     | CTGGGCTGAGCAATACAGTTC   |
| m-PPIA          | GAGCTGTTTGCAGACAAAGTTC  | CCCTGGCACATGAATCCTGG    |
| m-ZAG           | AGCAAAGGTTTTCCGAGGTTT   | GAGACCCTGTAGTGTCTTGTAA  |
| m-HSL           | CCAGCCTGAGGGCTTACTG     | CTCCATTGACTGTGACATCTCG  |
| m-ATGL          | TTCACCATCCGCTTGTTG      | AGTTCCACCTGCTCAGAC      |
| m-PPAR $\alpha$ | AGAGCCCCATCTGTCCTCTC    | ACTGGTAGTCTGCAAAACCAAA  |
| m-CPT1 $\alpha$ | AACAACGGCAGAGCAGAG      | CCACATAGAGGCAGAAGAGG    |
| m-UCP-1         | TCTCTGCCAGGACAGTACCCAA  | GAGTCGCAGAAAAGAAGCCACAA |
| h-FAS           | AAGGACCTGTCTAGGTTTGATGC | TGGCTTCATAGGTGACTTCCA   |
| h-FGF21         | ATGGATCGCTCCACTTTGACC   | GGGCTTCGGACTGGTAAACAT   |
| h-ACC           | ATGTCTGGCTTGACCTAGTA    | CCCCAAAGCGAGTAACAAATTCT |
| h-SREBP1        | TGGCTGCTCAATGGGCTGTT    | GCGATGCCTCCAGAAGTACACG  |
| h-PPIA          | CCCACCGTGTTCTTCGACATT   | GGACCCGTATGCTTTAGGATGA  |
| h-ZAG           | GCTTACCTGGAGGAGGAGTG    | TTCCCTGGGTAGAAGTCGTAG   |
| h-HSL           | CTCTGGTCTACTACGCCCAG    | CATCCCTTATGCAGCGTGAC    |
| h-ATGL          | ATGGTGGCATTTCAGACAACC   | CGGACAGATGTCACTCTCGC    |
| h-PPAR $\alpha$ | CCAGTATTTAGGAAGCTGTCCTG | CGTTGTGTGACATCCCGACAG   |
| h-CPT1 $\alpha$ | TCCAGTTGGCTTATCGTGGTG   | TCCAGAGTCCGATTGATTTTGC  |

Note: m: mouse; h: human
